# Supplementary material for: Effects of once-weekly semaglutide 2.4 mg on C-reactive protein in adults with overweight or obesity (STEP 1, 2, and 3): Exploratory analyses of three randomised, double-blind, placebo-controlled, phase 3 trials
Source: PubMed Central journal article supplement (PMC9713290; doi:10.1016/j.eclinm.2022.101737), 2022-11-29

**STEP 1**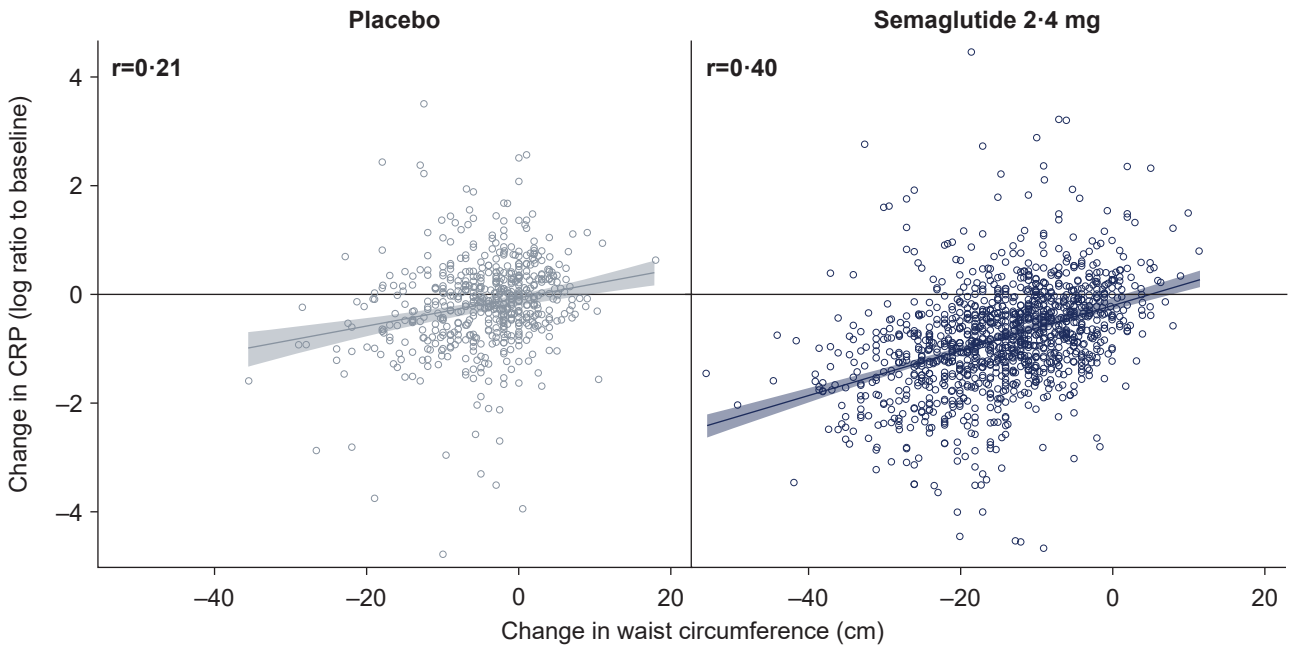**STEP 2**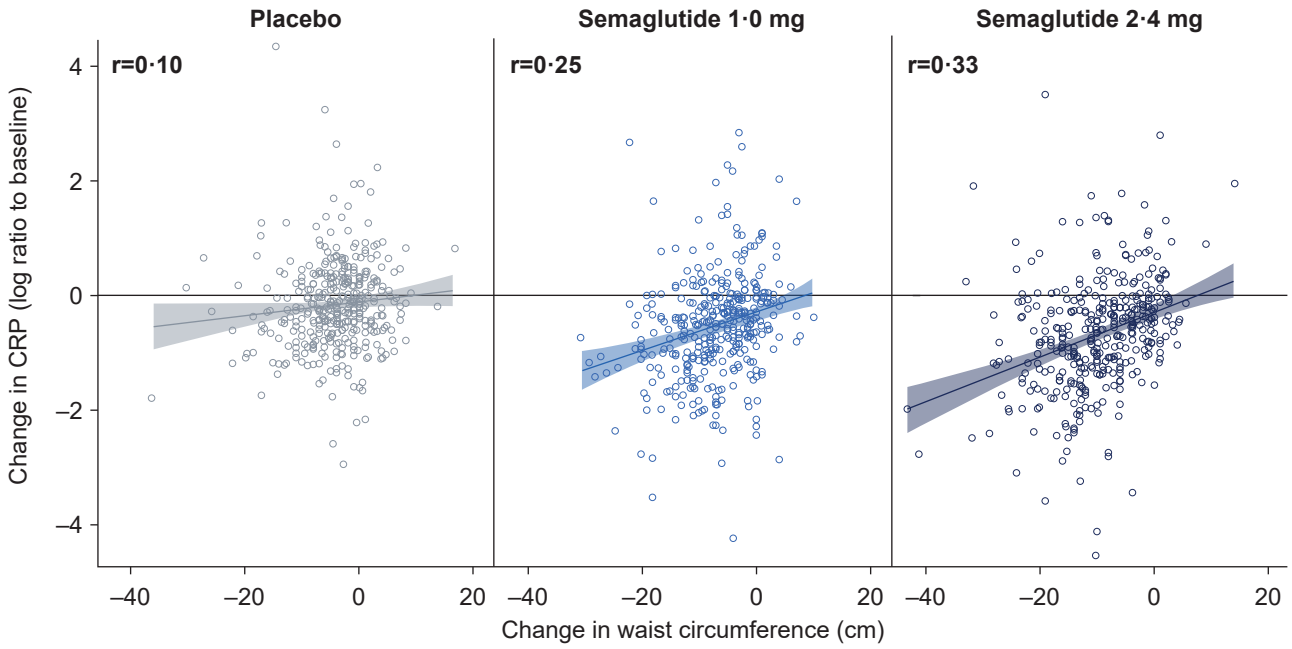**STEP 3**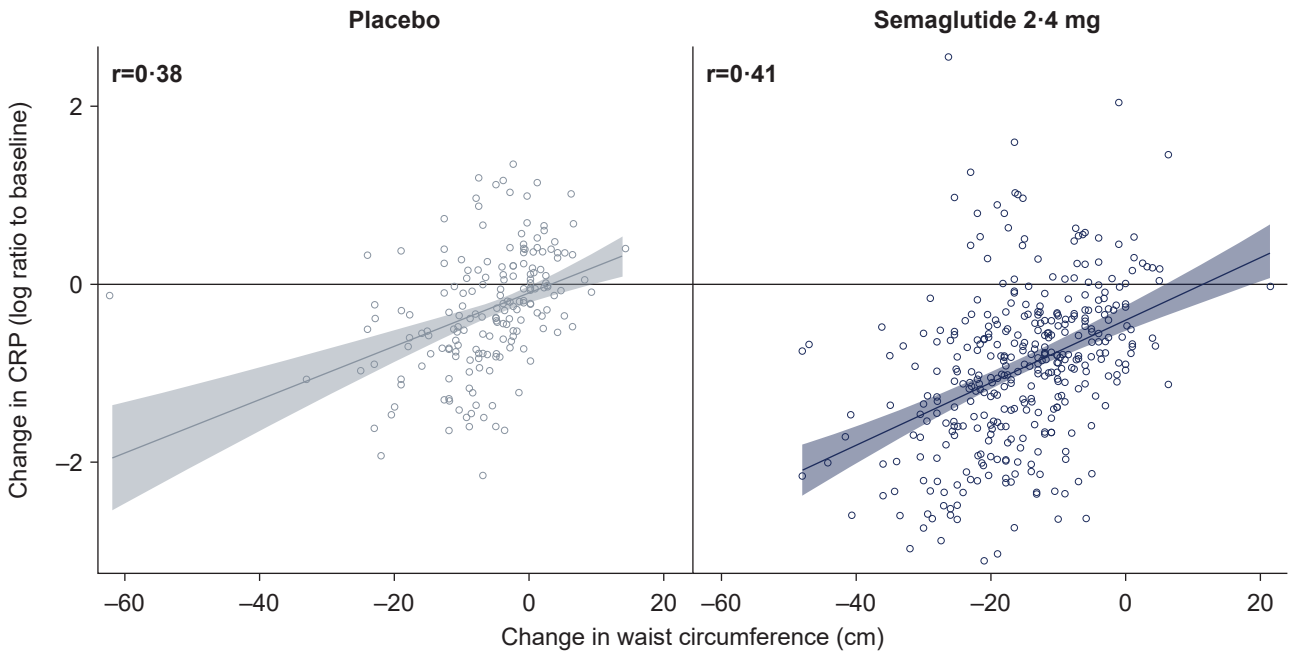

Supplement: mmc4.pdf [file mmc4.pdf]
